# Supplementary material for: Structural insights and characterization of human Npas4 protein
Source: PeerJ. 2018 Jun 14;6:e4978. doi: 10.7717/peerj.4978 (PMC6004298; doi:10.7717/peerj.4978)
Supplement: Table S2 [file peerj-06-4978-s005.docx]

| **Name of residue** | **Position** | **Kinase** |
| --- | --- | --- |
| Serine | 4 | PKC |
| 9 | PKC |
| 38 | PKC,PKA |
| 44 | DNAPK, PKA |
| 70 | CKII |
| 139 | CDC2, PKG |
| 154 | CDC2 |
| 156 | PKC,CDC2 |
| 161 | PKA, PKG, RSK |
| 273 | CKII |
| 315 | CKII |
| 321 | PKC |
| 328 | CKII, CDC2 |
| 345 | PKG |
| 352 | ATM, DNAPK, CKII |
| 374 | RSK, PKC |
| 382 | CDC2 |
| 385 | CKII |
| 394 | PKA |
| 496 | CKI |
| 546 | DNAPK, CDC2 |
| 577 | CDK5, P38MAPK |
| 673 | CKI |
| 785 | PKC, ATM |
| Threonine | 5 | PKC |
| 60 | P38MAPK |
| 130 | PKC |
| 136 | PKC |
| 143 | PKC |
| 153 | PKB, PKG |
| 331 | DNAPK |
| 339 | P38MAPK |
| 359 | CDC2 |
| 403 | PKC, CKI |
| 427 | CDK5, P38MAPK |
| 611 | P38MAPK, CDK5 |
| 728 | CKII |
| Tyrosine | 401 | INSR |
